# Supplementary material for: Study of Dandelion (Taraxacum mongolicum Hand.-Mazz.) Salt Response and Caffeic Acid Metabolism under Saline Stress by Transcriptome Analysis
Source: MDPI journal article supplement (doi:10.3390/genes15020220), 2024-02-09
Supplement: s1 [file s1]

Table S1 Primers pairs for qRT-PCR

| Gene ID      | Function annotation                     | Primers(5'-3')                                         |
|--------------|-----------------------------------------|--------------------------------------------------------|
| TbA05G077650 | 4-coumarate--CoA ligase                 | F: TCCAAACGAGACCACAATC<br>R: CATAGGAGGCAAACAAGACC      |
| TbA07G095410 | Shikimate O-hydroxycinnamoyltransferase | F: GATGTGCGTGAACCTTGCTT<br>R: CCAAGGATGTGAGACCAACT     |
| TbA07G106840 | 4-coumarate--CoA ligase                 | F: AGTTTGTCTTCTCGTTCCTTG<br>R: ATGTGCCGATTGAGTGATT     |
| TbA08G014310 | Caffeoylshikimate esterase              | F: TACCATCCAAGCTGCATTTA<br>R: ATCTCTGATTGCCTTTCCC      |
| TbA04G072330 | Caffeic acid 3-O-methyltransferase      | F: GTGGATACTGCACGATTGG<br>R: GCTTTGTCGGAAGAGTTTGT      |
| TbA07G012370 | Caffeic acid 3-O-methyltransferase      | F: GATGAAGTTGGTGGTTAAAGAAA<br>R: GGAAATGCCTCAAGAAGAATC |
| Novel.13839  | Caffeic acid 3-O-methyltransferase      | F: TGGCTTTCTTGTCTTTGAGTT<br>R: CTCTTGTTTGTGCGTAATGGCT  |
| novel.13840  | Caffeic acid 3-O-methyltransferase      | F: CTCTTGTTTGTGCGTAATGGCT:<br>R: TGGCTTTCTTGTCTTTGAGTT |
| GAPDH        | Internal reference gene                 | F: AGTTGGTTTCGTGGTATGAC<br>R: ACATGTCAGTGAACAGGTAGAC   |
